# Supplementary material for: KDM4B modulates ERα signaling pathway to participate in vascular smooth muscle cell calcification
Source: Research Square preprint supplement (doi:10.21203/rs.3.rs-6522511/v1), 2025-05-15
Supplement: Supplementary file 1 [file 88fee73fbb45898e4ecb10c5.docx]

**Supporting Information**

**KDM4B modulates ERα signaling pathway to participate**

**in vascular smooth muscle cell calcification**

Fei Liu1, 3, Yang Lv1, Yanxia Lin1, Chunyu Wang2, Shengli Wang2, Kai Zeng2, Baosheng Zhou2, Lin Lin2, Jianwei Feng2, Ge Sun2, Xiaocen Chang2, Mengsu Cao2, Hao Li2, Xihong Hu3, Kato Shigeaki4,5, Yue Zhao2*, Wen Tian1*

1 Department of Geriatric, the First Affiliated Hospital of China Medical University, Shenyang City 110001, Liaoning Province, China.

2 Department of Cell Biology, Key Laboratory of Medical Cell Biology, Ministry of Education, School of Life Sciences, China Medical University, Shenyang City 110122, Liaoning Province, China.

3 Department of Geriatric, Dalian Friendship Hospital Affiliated to Dalian Medical University

4Graduate School of Life Science and Engineering, Iryo Sosei University, Iino, Chuo-dai, Iwaki, Fukushima 9708551, Japan.

5Research Institute of Innovative Medicine, Tokiwa Foundation, Iwaki, Fukushima, Japan.

To whom correspondence should be addressed.

1. Wen Tian. Department of Geriatric, The First Affiliated Hospital of China Medical University, No.155 Nanjing North Street, He Ping District, Shenyang City 110001, Liaoning Province, China. Tel: +86 24 83283333;

email: dr_wentian@163.com

2. Yue Zhao. Department of Cell Biology, Key Laboratory of Medical Cell Biology, Ministry of Education, School of Life Sciences, China Medical University, No.77 Puhe Road, Shenyang North New Area, Shenyang City 110122, Liaoning Province, China.

Tel: +86 24 31939077; Fax: +86 24 31939077;

email: y[zhao30@cmu.edu.cn](mailto:zhao30@cmu.edu.cn)

**Supplemental Materials, including:**

**1. Supplementary data**

**2. Supplementary Figure Legends**

**Supplemental Figure S1.** KDM4B is highly expressed in β-GP induced calcification models in HASMCs.

**Supplemental Figure S2.** KDM4B regulate ERα-induced transactivation independent on its demethylase activity in MOVAS cells.

**Supplemental Figure S3.** KDM4B modulate on the expression of estrogen-inducing gene mRNA and protein in MOVAS cells.

**Supplemental Figure S4.** Ectopic expression of KDM4B aggravates β-GP induced calcification in HASMCs.

**Supplemental Figure S5.** KDM4B-mediated enhancement of β-GP induced calcification is attenuated by the treatment of estrogen.

**Supplementary table 1. siRNA used in this study**

| Name | Sense(F’) | Anti-sense(R’) |
| --- | --- | --- |
| KDM4B#1 | CCUCUUCACGCAGUACAAUTT | AUUGUACUGCGUGAAGAGGTT |
| KDM4B#3 | GCCGGAAGCGGAUGAAGAATT | UUCUUCAUCCGCUUCCGGCTT |

dTdT: DNA bases within RNA oligos.

**Supplementary table 2. Primers used for quantitative RT-PCR in HASMC**

| Name | Sense(F’) | Anti-sense(R’) |
| --- | --- | --- |
| KDM4B | CGGGTTCTATCTTTGTTTCTCTCACCCG | AAGGAAGCCTCTGGAACACCTG |
| BMP2 | ACCCGCTGTCTTCTAGCGT | TTTCAGGCCGAACATGCTGAG |
| Runx2 | ATCCCCATCCATCCACTCCA | GGGGTGTAGGTAAAGGTGGC |
| α-SMA | GTACCACCATGTACCCAGGC | GCTGGAAGGTAGACAGCGAA |
| ESR1 | CTAACTTGCTCTTGGACAGGAA | CAGGACTCGGTGGATATGGT |
| Gas6 | CATCAACAAGTATGGGTCTCCGT | GTTCTCCTGGCTGCATTCGTTGA |
| β-actin | CTCGCCTTTGCCGATCC | GGGGTACTTCAGGGTGAGGA |

**Supplementary table 3. Primers of ChIP used for quantitative RT-PCR**

| Name | Sense(F’) | Anti-sense(R’) |
| --- | --- | --- |
| Gas6-ERE | CAGACCGAGCGCTTGAGG | GAGAGCGAAGGGGCCAT |
|  |  |  |

**Supplementary Figures**


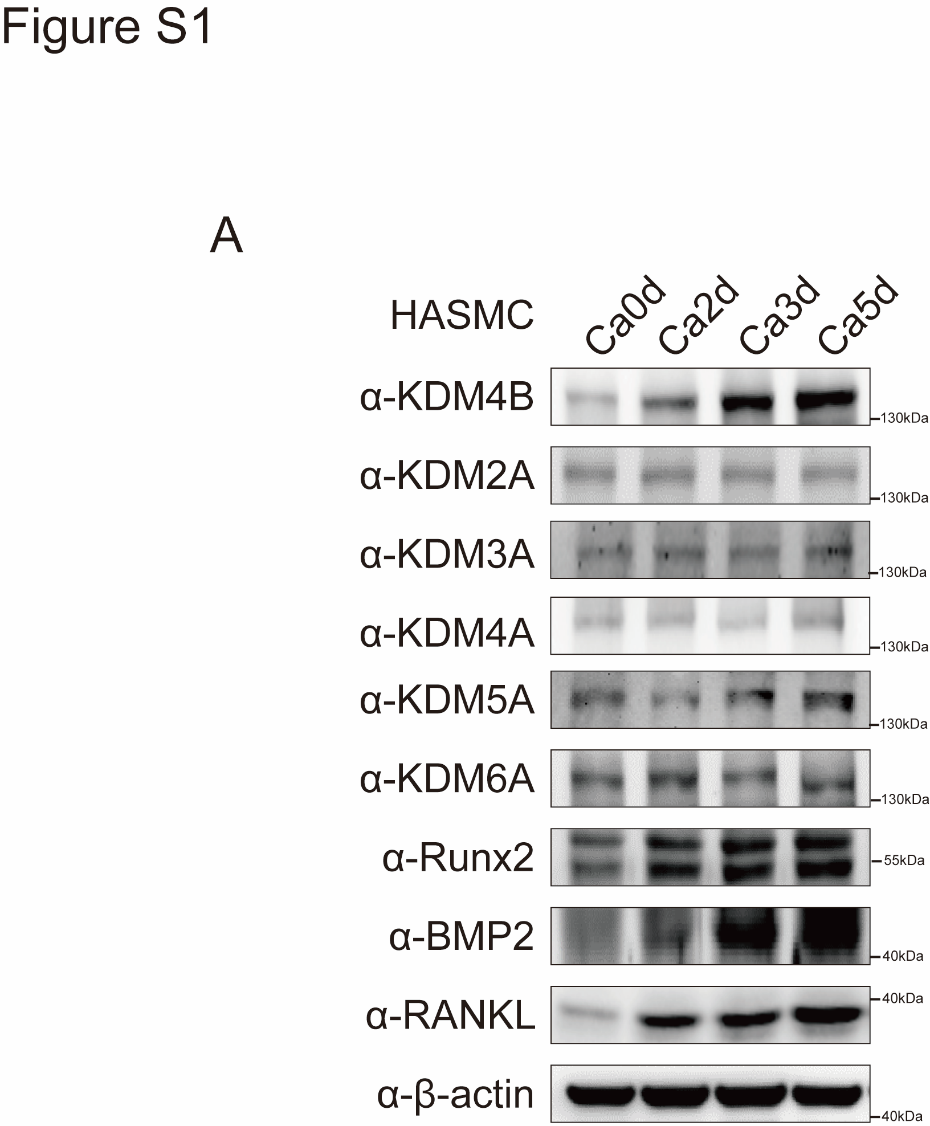


**Supplemental Figure S1**

**Figure S1. KDM4B is highly expressed in β-GP induced calcification models in HASMCs.**

(A)Western blot analysis for KDM4B, KDM2A, KDM3A, KDM4A, KDM5A, KDM6A, Runx2, BMP2, RANKL protein expression in different days in HASMCs treated with 5mM β-GP, β-actin was used as a loading control, and the day 0 was set as the control in each parameter. **p* < 0.05, ** *p* < 0.01 and ns stands for no significance.


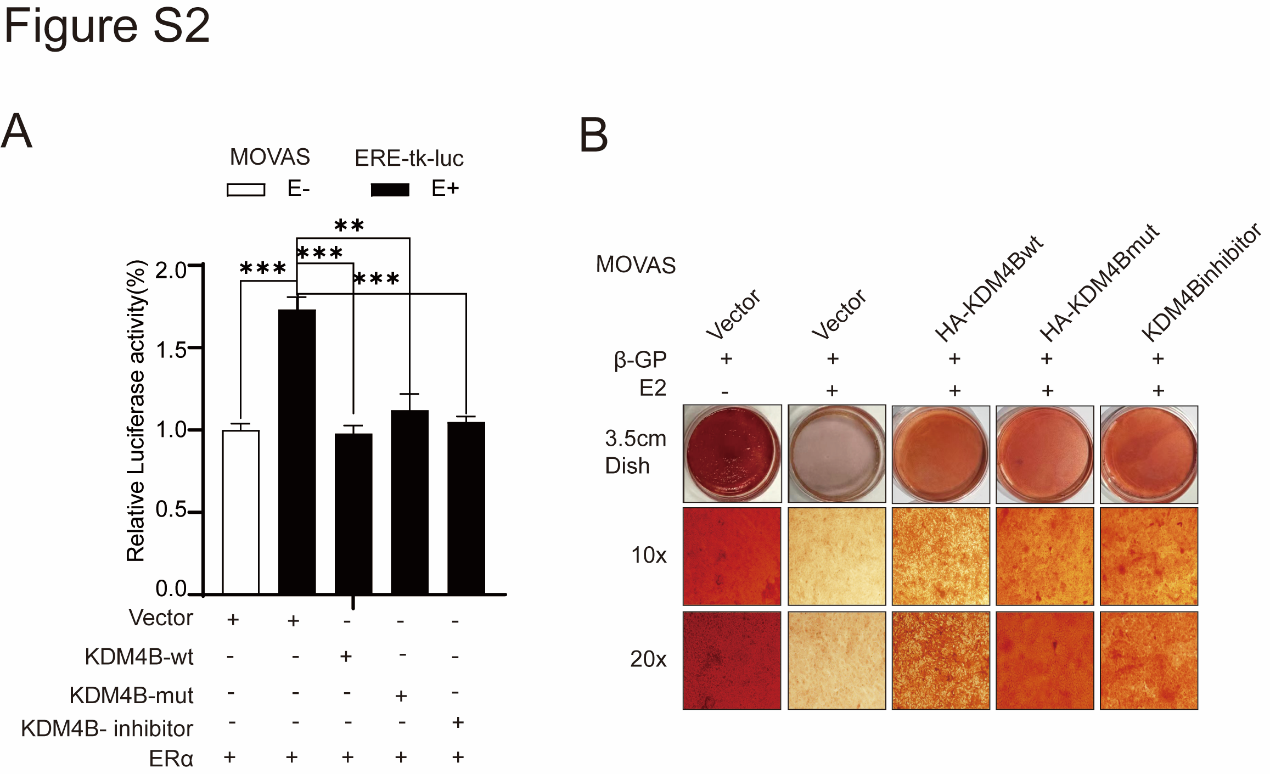


**Supplemental Figure S2**

**Figure S2 KDM4B regulate ERα-induced transactivation independent on its demethylase activity in MOVAS cells.**

(A) KDM4B (HTE/ATA) and KDM4B inhibitor carrying a loss of function in demethylase activity exhibits reduced coactivation function on ERα action in MOVAS cells. (B) Alizarin red staining in MOVAS cells. KDM4Bwt overexpression, KDM4Bmut overexpression and KDM4B inhibitor-mediated enhancement of β-GP induced calcification in MOVAScells.


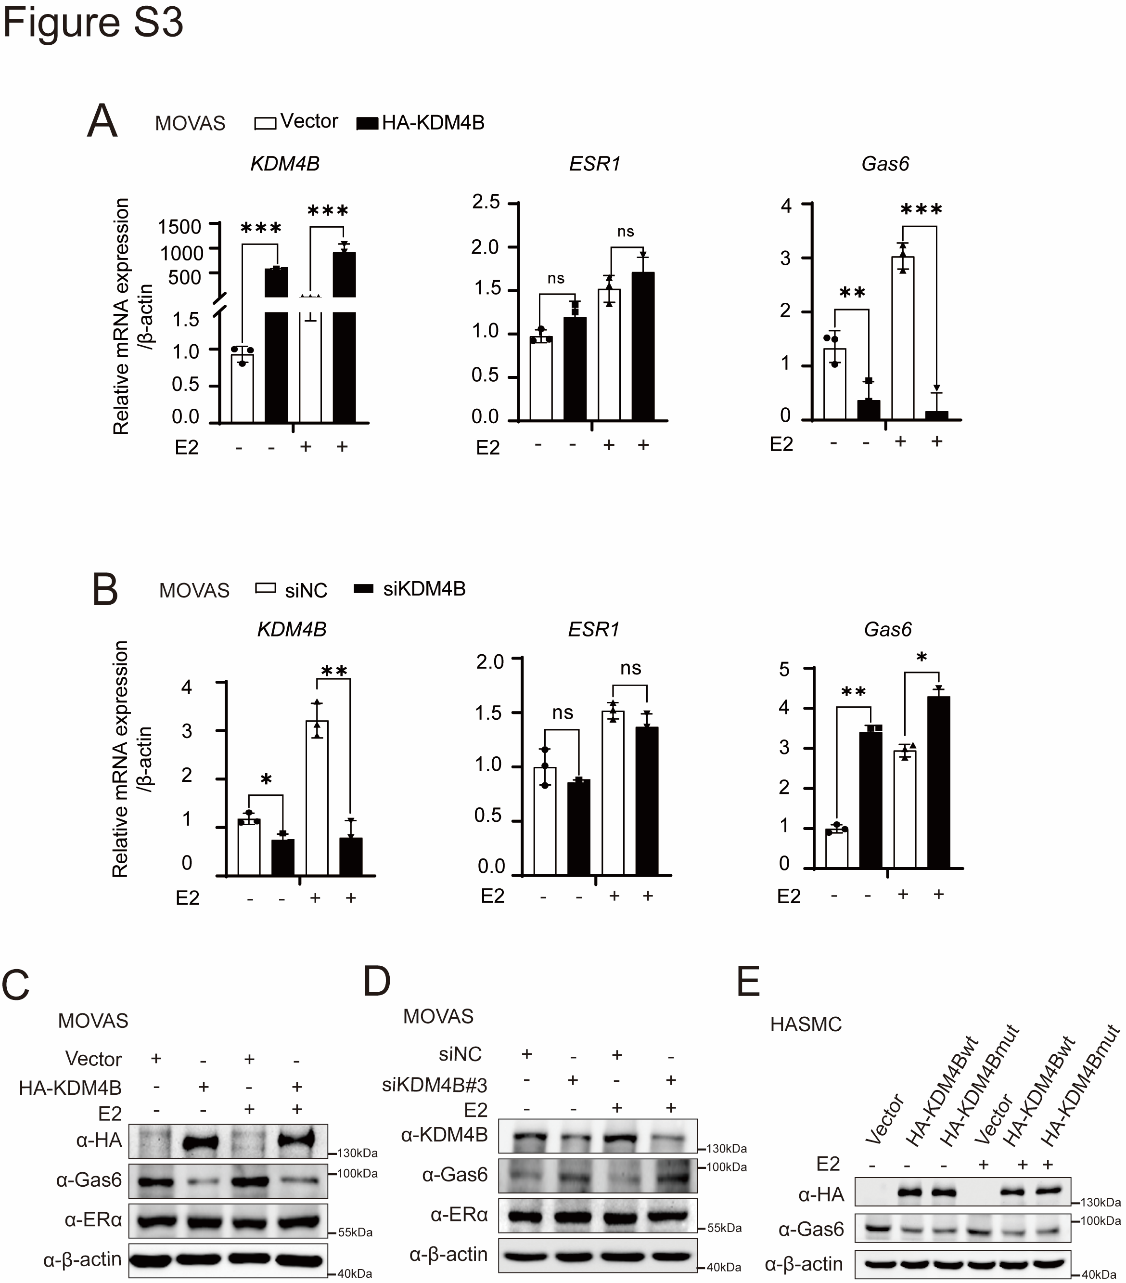


**Supplemental Figure S3**

**Figure S3 KDM4B modulate on the expression of estrogen-inducing gene mRNA in MOVAS cells.**

(A-B) qPCR analysis was examined for the effects of KDM4B on mRNA expression of endogenous ERα target genes in MOVAS cells. Statistical significance was determined using Student t-tests. Error bars represent mean± SD. **p* < 0.05, ** *p* < 0.01 and ns stands for no significance. (C-D) The effects of KDM4B on protein expression of endogenous ERα target genes as indicated in MOVAS cells. β-actin was used as a control. (E) The effects of KDM4Bwt and KDM4B mutant on protein expression of endogenous ERα target genes as indicated in HASMCs. β-actin was used as a control.


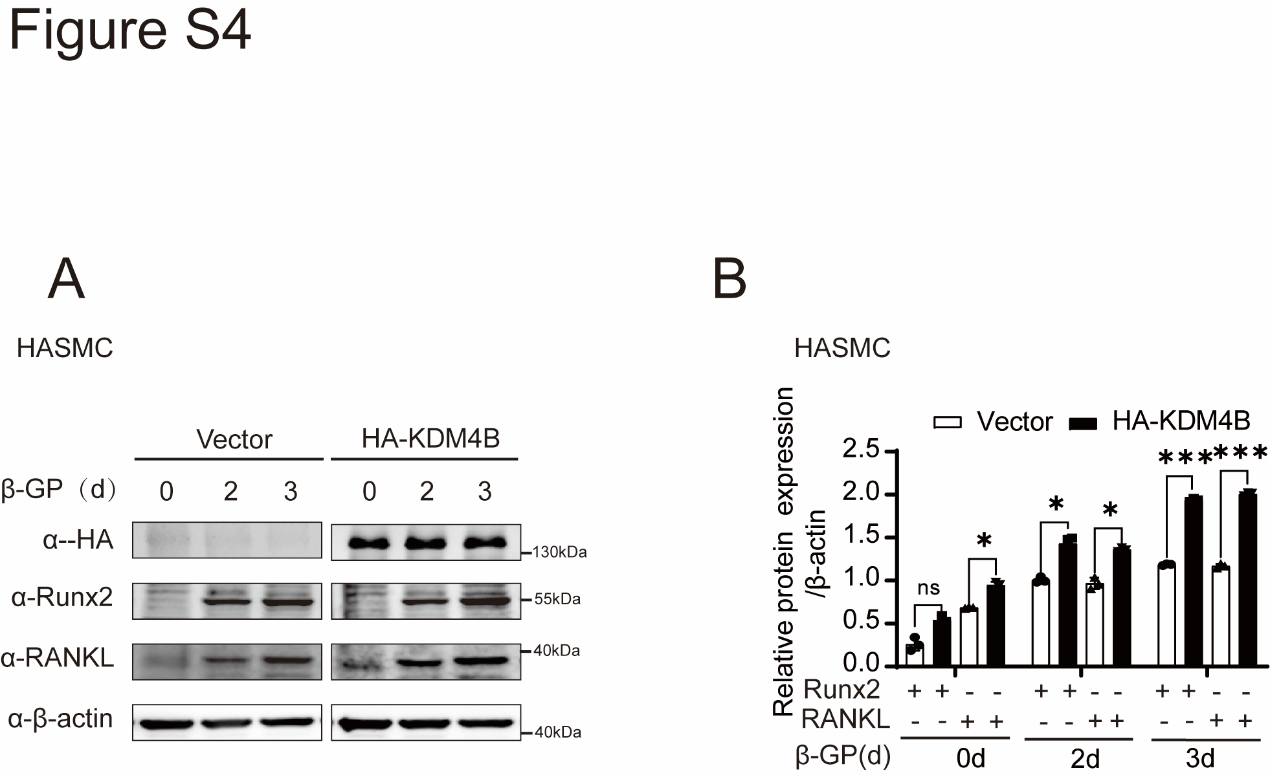


**Supplemental Figure S4**

**Figure S4 Ectopic expression of KDM4B aggravates β-GP induced calcification in HASMCs.**

(A-B) Western blot analysis and quantification of protein expression for HA-KDM4B, Runx2, RANKL and β-actin in HASMCs, with treated by β-GP was set as control in each parameter. Data were expressed as the mean ± SD of triplicate experiments. **p* < 0.05, ** *p* < 0.01 and ns stands for no significance.


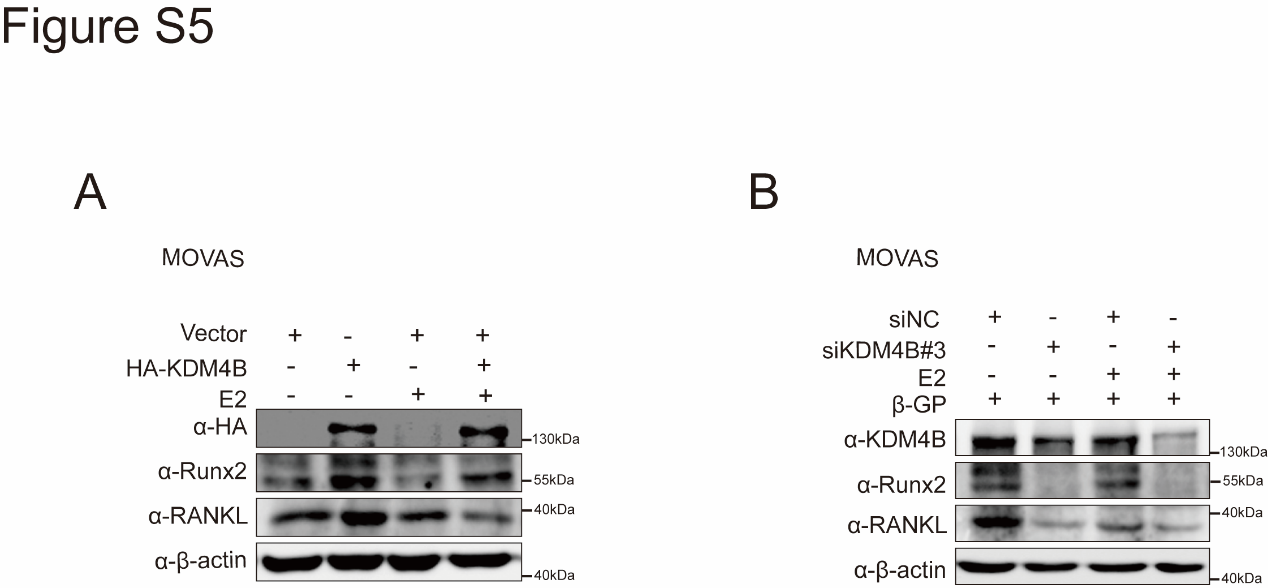


**Supplemental Figure S5**

**Figure S5 KDM4B-mediated enhancement of β-GP induced calcification is attenuated by the treatment of estrogen.**

(A) Western blot assay indicated the protein expression for HA-KDM4B, Runx2, RANKL and β-actin, β-actin was used as a loading control. (B)The KDM4B depletion by siRNA against KDM4B (siKDM4B) in MOVAS cells and with or without treated by estrogen was set as the control in each parameter. Data were expressed as the mean ± SD of triplicate experiments.
